# Supplementary material for: Somatic and Germ-Line Mutations of theHRPT2Gene in Sporadic Parathyroid Carcinoma
Source: Atypon-hosted journal article supplement (doi:10.1056/nejmoa031237), 2003-10-29
Supplement: nejm_shattuck_1722sa1.pdf [file nejm_shattuck_1722sa1.pdf]

# Supplementary Appendix

This appendix has been provided by the authors to give readers additional information about their work.

Supplement to: Shattuck TM, Välimäki S, Obara T, et al. Somatic and Germ-Line Mutations of the *HRPT2* Gene in Sporadic Parathyroid Carcinoma. *N Engl J Med* 2003;349:1722-9.

**Supplementary Appendix 1. Primers and Conditions for Polymerase-Chain-Reaction (PCR) Amplification and Sequencing of the *HRPT2* Gene in Parathyroid-Carcinoma DNA.\***

| Exon  | Forward Primer                                              | Reverse Primer           | PCR Product Size<br><i>bp</i> | Annealing Temperature<br>$^{\circ}\text{C}$ |
|-------|-------------------------------------------------------------|--------------------------|-------------------------------|---------------------------------------------|
| 1     | GAGGACGGCTGTTAGTGCT (PCR)†<br>CGAAGGAGGAGGAGGAAGAG (SEQ)†   | CCCCTTCTTTCCTTACCCTA     | 451                           | 55                                          |
| 2     | TAAATGAATCCAGCCTGAAG                                        | AGGCCAGACCCTGTCTCT       | 251                           | 58                                          |
| 3     | AAAGTGCTGGGATTCTAGG                                         | TGGACAAAAATGAAGGTAGG     | 599                           | 58                                          |
| 4-5   | AACATGTTTTTG CAGAGCTG (PCR)†<br>ACCTAGAGAAAATCACCATA (SEQ)† | CTCCTCAGGTTACTGCAATC     | 451                           | 55                                          |
| 6     | GGCCTAAAGACTGATACC                                          | CGAACTTAAGAGCAAAGAGG     | 351                           | 55                                          |
| 7     | GAATGCCTGCTGTGAAAA                                          | TGTGAAGGAGCTTGCAATTT     | 502                           | 55                                          |
| 8     | CTCTGGATCAATATCTTAGTAGTGG                                   | GTCTTCAACGTTACTACTGTC    | 348                           | 55                                          |
| 9     | ATGGTCATGCTACTGCACTC                                        | CCAACCCTTACCCTTAAACA     | 251                           | 55                                          |
| 10    | CAGAGATAGTCTTAACCAGCTTC                                     | CTTCAACATGTGCTACTCACAT   | 384                           | 55                                          |
| 11    | AACATGTTCACTGGAGTAACC                                       | TGCACTGTTACGATCTTTTG     | 251                           | 55                                          |
| 12-13 | TGGTAACTGAAACTGCAGA                                         | GTATCTCAATATCCTACGTACAGG | 713                           | 58                                          |
| 14    | ATCTTCCCATTTTCATCACG                                        | CCCCATCTCTTAAAAAGCAA     | 321                           | 55                                          |
| 15    | TGCCTAAGGGATTATAGTAGC                                       | ACATCATATGCGCAGAACT      | 281                           | 55                                          |
| 16    | GGCGTGATAAACCTGAAT                                          | GAAAGAAGGGAATTAGGGAA     | 401                           | 55                                          |
| 17    | GAGGAGTGTTATTCTAGCTTATTC                                    | GATCAATCTGTGACCTTCTTCA   | 301                           | 55                                          |

\* Primer sequences are listed from the 5' to the 3' ends. Primers were constructed on the basis of the alignment of the complementary DNA sequence (GenBank accession number XM-029845) with the genomic sequence of AL390863 and AL139133. Sequences of primers 1 forward and 17 reverse are located within 5' and 3' untranslated regions, whereas all other primers are derived from intronic sequences.<sup>20</sup> The PCR conditions were as follows for all reactions except those involving exons 12 to 13: a 20- $\mu\text{l}$  reaction mixture with 25 ng of DNA, 20 pmol of each primer, 200 mM of each deoxyribonucleoside triphosphate, 1.25 U of Amplitaq Gold DNA Polymerase (Applied Biosystems), 1 $\times$  PCR buffer (Applied Biosystems), and 1.0 to 1.5 mM magnesium chloride was subjected to initial denaturation at 95 $^{\circ}\text{C}$  for 10 minutes, 35 cycles of denaturation at 95 $^{\circ}\text{C}$  for 30 seconds, annealing as noted above for 30 seconds, and elongation at 72 $^{\circ}\text{C}$  for 30 seconds, with a final period of extension at 72 $^{\circ}\text{C}$  for 10 minutes. The PCR conditions for exons 12 to 13 were as follows: a 50- $\mu\text{l}$  reaction mixture with 25 ng of DNA, 50 pmol of each primer, 200 mM of each deoxyribonucleoside triphosphate, 2 U of Eppendorf HotMaster DNA Polymerase (Brinkman), and 1 $\times$  HotMaster *Taq* buffer with 2.5 mM magnesium (Brinkman) was subjected to initial denaturation at 96 $^{\circ}\text{C}$  for 6 minutes, 35 cycles of denaturation at 95 $^{\circ}\text{C}$  for 30 seconds, annealing at 58 $^{\circ}\text{C}$  for 30 seconds, and elongation at 72 $^{\circ}\text{C}$  for 45 seconds, with a final period of extension at 72 $^{\circ}\text{C}$  for 10 minutes.

† Different primers were used for PCR and sequencing (SEQ) reactions. For all other exons, the same primers were used for both sequencing and PCR.
